# Supplementary material
Source: publisher figshare collection journal article supplement (https://sage.figshare.com/ndownloader/files/17937683)
Supplement: Supplementary file 1 [file 17937683]

Table S1. *Demographic Composition of the Sample and Comparisons with US Census Data*

|                          | <u>Adult GfK panel</u><br><u>members, %*</u> | <u>Wave 1</u><br><u>(2-4 wks post BMB)</u><br><u>Weighted %†</u> | <u>Wave 2</u><br><u>(6mos. post-BMB)</u><br><u>Weighted %†</u> | <u>Adult U.S Census</u><br><u>Population, December</u><br><u>2012 Current</u><br><u>Population Survey</u><br><u>Weighted %†</u> |
|--------------------------|----------------------------------------------|------------------------------------------------------------------|----------------------------------------------------------------|---------------------------------------------------------------------------------------------------------------------------------|
| <u>Gender</u>            |                                              |                                                                  |                                                                |                                                                                                                                 |
| Male                     | 48.10                                        | 47.61                                                            | 47.94                                                          | 48.10                                                                                                                           |
| Female                   | 51.90                                        | 52.39                                                            | 52.06                                                          | 51.90                                                                                                                           |
| <u>Age</u>               |                                              |                                                                  |                                                                |                                                                                                                                 |
| 18-24                    | 11.8                                         | 10.95                                                            | 10.80                                                          | 12.70                                                                                                                           |
| 25-34                    | 17.1                                         | 15.94                                                            | 17.00                                                          | 17.50                                                                                                                           |
| 35-44                    | 16.9                                         | 19.08                                                            | 18.29                                                          | 16.80                                                                                                                           |
| 45-54                    | 17.4                                         | 18.01                                                            | 18.39                                                          | 18.50                                                                                                                           |
| 55-64+                   | 18.9                                         | 18.84                                                            | 18.17                                                          | 16.40                                                                                                                           |
| 65+                      | 17.8                                         | 17.18                                                            | 17.35                                                          | 18.10                                                                                                                           |
| <u>Household Income‡</u> |                                              |                                                                  |                                                                |                                                                                                                                 |
| Under \$10,000           | 5.00                                         | 5.40                                                             | 5.25                                                           | 5.40                                                                                                                            |
| \$10,000 to \$24,499     | 13.00                                        | 13.62                                                            | 13.88                                                          | 13.40                                                                                                                           |
| \$25,000 to \$49,999     | 23.50                                        | 23.01                                                            | 22.91                                                          | 23.40                                                                                                                           |
| \$50,000 to \$74,499     | 18.90                                        | 19.62                                                            | 19.61                                                          | 18.60                                                                                                                           |
| \$75,000 or more         | 38.50                                        | 38.35                                                            | 38.35                                                          | 39.20                                                                                                                           |
| <u>Region</u>            |                                              |                                                                  |                                                                |                                                                                                                                 |
| Northeast                | 18.30                                        | 18.27                                                            | 18.23                                                          | 18.20                                                                                                                           |
| Midwest                  | 21.80                                        | 22.05                                                            | 22.08                                                          | 21.50                                                                                                                           |
| South                    | 36.90                                        | 36.73                                                            | 36.66                                                          | 37.00                                                                                                                           |
| West                     | 23.00                                        | 22.95                                                            | 23.02                                                          | 23.20                                                                                                                           |

Table S1. *Demographic Composition of the Sample and Comparisons with US Census Data (con't)*

|                                | <u>Adult GfK panel</u><br><u>members,*</u><br><u>Weighted %</u> | <u>Wave 1</u><br><u>(2-4 wks post BMB)</u><br><u>Weighted %†</u> | <u>Wave 2</u><br><u>(6mos. post-BMB)</u><br><u>Weighted %†</u> | <u>Adult U.S Census</u><br><u>Population, December</u><br><u>2012 Current Population</u><br><u>Survey</u><br><u>Weighted %†</u> |
|--------------------------------|-----------------------------------------------------------------|------------------------------------------------------------------|----------------------------------------------------------------|---------------------------------------------------------------------------------------------------------------------------------|
| <u>Marital Status</u>          |                                                                 |                                                                  |                                                                |                                                                                                                                 |
| Married                        | 54.00                                                           | 52.29                                                            | 51.30                                                          | 53.70                                                                                                                           |
| Not Married                    | 46.00                                                           | 47.71                                                            | 48.70                                                          | 46.30                                                                                                                           |
| <u>Race</u>                    |                                                                 |                                                                  |                                                                |                                                                                                                                 |
| White, Non-Hispanic            | 77.60                                                           | 68.73                                                            | 68.50                                                          | 79.50                                                                                                                           |
| African American, Non-Hispanic | 12.40                                                           | 10.95                                                            | 10.94                                                          | 12.20                                                                                                                           |
| Other, Non-Hispanic            | 4.70                                                            | 5.63                                                             | 5.75                                                           | 6.60                                                                                                                            |
| 2+ races, Non-Hispanic         | 5.20                                                            | 1.34                                                             | 1.35                                                           | 1.60                                                                                                                            |
| Hispanic                       | 14.50                                                           | 13.35                                                            | 13.46                                                          | 15.00                                                                                                                           |
| <u>Education</u>               |                                                                 |                                                                  |                                                                |                                                                                                                                 |
| Less than HS                   | 12.20                                                           | 9.65                                                             | 9.17                                                           | 12.60                                                                                                                           |
| HS Diploma or Equivalent       | 29.80                                                           | 32.29                                                            | 32.92                                                          | 30.10                                                                                                                           |
| Some College                   | 28.80                                                           | 30.79                                                            | 30.81                                                          | 28.80                                                                                                                           |
| Bachelor's Degree or Higher    | 29.20                                                           | 27.27                                                            | 27.10                                                          | 28.60                                                                                                                           |

\*Active profiled adults are weighted to be representative of the US population on age, sex, race, Hispanic ethnicity, language proficiency, region, metro status, education, household income, homeownership, and Internet access using poststratification adjustments to offset any nonresponse or noncoverage bias.

†Estimates were calculated using December 2012 Current Population Survey (CPS) microdata available at [www.census.gov](http://www.census.gov). The data are weighted using CPS final individual weights.

‡National housing and income statistics are from March 2012 CPS Annual Social and Economic Supplement.

Table S2. Weighted covariances between key study variables and covariates (N=3598)

|                                      | 1       | 2       | 3      | 4       | 5      | 6      | 7      | 8       | 9       | 10     | 11   | 12     | 13  |
|--------------------------------------|---------|---------|--------|---------|--------|--------|--------|---------|---------|--------|------|--------|-----|
| 1. BMB Acute Stress (W1)             | -       |         |        |         |        |        |        |         |         |        |      |        |     |
| 2. BMB Posttraumatic Stress (W2)     | .50***  | --      |        |         |        |        |        |         |         |        |      |        |     |
| 3. Fear of Future Terrorism (W2)     | .39***  | .59***  | --     |         |        |        |        |         |         |        |      |        |     |
| 4. Functional Impairment (W2)        | .33***  | .43***  | .31*** | --      |        |        |        |         |         |        |      |        |     |
| 5. BMB Media Exposure (hrs/day) (W1) | .42***  | .35***  | .27*** | .19***  | --     |        |        |         |         |        |      |        |     |
| 6. Graphic (bloody) Images (W1)      | .16***  | .16***  | .17*** | .09***  | .30*** | --     |        |         |         |        |      |        |     |
| 7. Non-graphic (chaotic) Images (W1) | .07*    | .07**   | .13*** | .04     | .27*** | .71*** | --     |         |         |        |      |        |     |
| 8. Direct BMB Exposure               | .11***  | .09**   | .08**  | -.002   | .14*** | .18*** | .17*** | --      |         |        |      |        |     |
| 9. Pre-BMB Mental Health             | .12***  | .08**   | .05*   | .26***  | .03    | .04    | .02    | -.004   | --      |        |      |        |     |
| 10. Age                              | -.04    | -.01    | .09*** | .04     | .03    | .08**  | -.15** | .01     | .01     | --     |      |        |     |
| 11. Female Gender                    | .08*    | .01     | .08**  | .07**   | .004   | .01    | .02    | .13***  | .13***  | .02    | --   |        |     |
| 12. Income                           | -.14*** | -.12*** | -.05*  | -.22*** | -.06*  | .11*** | .11*** | -.09*** | -.09*** | -.03   | -.05 | --     |     |
| 13. College Education                | -.06**  | -.10*** | -.06** | -.12*** | -.05** | .02    | .02    | -.07*** | -.07*** | -.03   | -.02 | .35*** | --  |
| 14. White Ethnicity                  | -.11*** | -.17*** | -.06*  | -.10*** | -.06*  | .08**  | .13*** | .06**   | .06**   | .21*** | .01  | .14*** | .03 |

BMB=Boston Marathon bombing

Female gender =1; Male gender=0

College education=1; Less than a college education=0

White ethnicity=1; non-White=0
